# Supplementary material for: T2’-Imaging to Assess Cerebral Oxygen Extraction Fraction in Carotid Occlusive Disease: Influence of Cerebral Autoregulation and Cerebral Blood Volume
Source: PLoS One. 2016 Aug 25;11(8):e0161408. doi: 10.1371/journal.pone.0161408 (PMC4999181; doi:10.1371/journal.pone.0161408)
Supplement: S2 File — (XLS) [file pone.0161408.s002.xls]

## Sheet: Tabelle1
Patient	Perfusionsverzögerung	qT2' [ms]			CBV [ml/100 g Gewebe]
		Stenoseseite	Gesunde Seite	Quotient	Stenoseseite	Gesunde Seite	Quotient
OEF_Pat.1	MTT>0sec	119	125	0.95	4.66	4.71	0.99
OEF_Pat.2	MTT>0sec	114	113	1.01	4.57	4.53	1.01
OEF_Pat.4	MTT>0sec	118	122	0.97	6.95	7.34	0.95
OEF_Pat.9	MTT>0sec	105	109	0.96	7.01	7.03	1
OEF_Pat.12	MTT>0sec	134	134	1	14.28	17.14	0.83
OEF_Pat.13	MTT>0sec	117	130	0.9	6.32	6.39	0.99
OEF_Pat.15	MTT>0sec	120	137	0.88	10.62	10.39	1.02
OEF_Pat.17	MTT>0sec	97	143	0.68	7.76	8.31	0.93
OEF_Pat.18	MTT>0sec	117	135	0.87	7.23	7.05	1.03
OEF_Pat.20	MTT>0sec	115	132	0.87	4.74	5.09	0.93
OEF_Pat.21	MTT>0sec	105	117	0.9	8.65	8.56	1.01
OEF_Pat.22	MTT>0sec	107	135	0.79	4.44	4.31	1.03
OEF_Pat.24	MTT>0sec	126	134	0.94	7.25	7.03	1.03
OEF_Pat.25	MTT>0sec	115	123	0.93	11.83	11.95	0.99
OEF_Pat.1	MTT0-2sec	119	125	0.95	4.66	4.71	0.989
OEF_Pat.2	MTT0-2sec	112	116	0.96	5.1	5.06	1.007
OEF_Pat.4	MTT0-2sec	121	121	1	7.81	7.97	0.979
OEF_Pat.9	MTT0-2sec	105	109	0.963	7.01	7.03	0.997
OEF_Pat.12	MTT0-2sec	116	126	0.92	12.76	11.68	1.092
OEF_Pat.13	MTT0-2sec	118	118	1	7.41	6.36	1.165
OEF_Pat.15	MTT0-2sec	119	122	0.975	16.06	17.63	0.91
OEF_Pat.17	MTT0-2sec	127	111	1.144	9.59	7.29	1.315
OEF_Pat.18	MTT0-2sec	118	138	0.855	6.13	6.2	0.988
OEF_Pat.20	MTT0-2sec	115	132	0.871	4.74	5.09	0.931
OEF_Pat.21	MTT0-2sec	110	114	0.964	8.49	10.84	0.783
OEF_Pat.22	MTT0-2sec	107	135	0.792	4.44	4.31	1.03
OEF_Pat.24	MTT0-2sec	124	131	0.946	7.4	7.28	1.016
OEF_Pat.25	MTT0-2sec	118	123	0.959	10.91	11.3	0.965
OEF_Pat.2	MTT>2sec	113	113	1	4.29	4.14	1.036
OEF_Pat.4	MTT>2sec	110	122	0.901	4.6	5.72	0.804
OEF_Pat.12	MTT>2sec	135	136	0.992	15.36	15.47	0.992
OEF_Pat.13	MTT>2sec	116	133	0.872	6.34	6.32	1.003
OEF_Pat.15	MTT>2sec	121	139	0.87	10.41	10.15	1.025
OEF_Pat.17	MTT>2sec	92	150	0.613	7.31	8.05	0.908
OEF_Pat.18	MTT>2sec	121	127	0.952	12.17	8.22	1.48
OEF_Pat.21	MTT>2sec	104	117	0.888	8.78	9.59	0.915
OEF_Pat.24	MTT>2sec	123	136	0.904	7.78	7.34	1.059
OEF_Pat.25	MTT>2sec	111	119	0.932	12.98	12	1.081
OEF_Pat.2	MTT>4sec	112	103	1.087	3.84	4.12	0.932
OEF_Pat.4	MTT>4sec	89	124	0.717	5.55	3.93	1.412
OEF_Pat.12	MTT>4sec	135	137	0.985	12.39	14.52	0.853
OEF_Pat.13	MTT>4sec	113	134	0.843	6.02	6.34	0.949
OEF_Pat.15	MTT>4sec	118	137	0.861	9.78	9.94	0.983
OEF_Pat.17	MTT>4sec	88	156	0.564	7.06	7.75	0.91
OEF_Pat.18	MTT>4sec	88	130	0.676	23.11	15.87	1.45
OEF_Pat.21	MTT>4sec	109	123	0.886	7.6	8.48	0.896
OEF_Pat.24	MTT>4sec	120	141	0.851	7.99	8.1	0.986
OEF_Pat.25	MTT>4sec	117	126	0.928	13.84	12.28	1.127
OEF_Pat.12	MTT>6sec	134	136	0.99	11.07	13.12	0.84
OEF_Pat.13	MTT>6sec	111	135	0.82	5.81	6.17	0.94
OEF_Pat.17	MTT>6sec	80	159	0.5	6.83	7.37	0.93
OEF_Pat.15	MTT>6sec	119	136	0.88	9.44	9.91	0.95
OEF_Pat.21	MTT>6sec	109	128	0.85	7.09	8.04	0.88
OEF_Pat.25	MTT>6sec	134	128	1.05	7.26	7.04	1.03
OEF_Pat.12	MTT>8sec	132	137	0.963	10.44	14.19	0.735
OEF_Pat.13	MTT>8sec	111	134	0.828	5.9	6.01	0.981
OEF_Pat.15	MTT>8sec	121	138	0.876	9.21	9.39	0.98
OEF_Pat.17	MTT>8sec	80	157	0.509	6.66	7.52	0.885
OEF_Pat.21	MTT>8sec	113	123	0.918	7.32	8.68	0.843
OEF_Pat.12	MTT>10sec	131	137	0.956	10.13	13.98	0.724
OEF_Pat.13	MTT>10sec	111	130	0.853	6.39	6.31	1.012
OEF_Pat.15	MTT>10sec	123	139	0.884	8.54	8.8	0.97
OEF_Pat.17	MTT>10sec	79	167	0.473	5.65	6.43	0.878
OEF_Pat.21	MTT>10sec	116	117	0.991	7.88	8.64	0.912
OEF_Pat.12	MTT>12sec	129	139	0.928	9.99	14.24	0.701
OEF_Pat.13	MTT>12sec	115	153	0.751	4.86	6.35	0.765
OEF_Pat.15	MTT>12sec	127	131	0.969	8.34	8.53	0.977
OEF_Pat.17	MTT>12sec	89	191	0.465	5.57	5.42	1.027
OEF_Pat.21	MTT>12sec	112	118	0.949	9.84	10.9	0.902
OEF_Pat.12	MTT>14sec	129	138	0.934	9.61	13.19	0.728
OEF_Pat.13	MTT>14sec	119	158	0.753	5.4	5.8	0.931
OEF_Pat.15	MTT>14sec	134	124	1.08	8.03	9.49	0.846
OEF_Pat.12	MTT>16sec	128	141	0.907	9.56	12.96	0.737
OEF_Pat.12	MTT>18sec	123	138	0.89	8.46	12.3	0.69
OEF_Pat.12	MTT>20sec	124	139	0.89	8.25	11.84	0.7

## Sheet: Tabelle2
Patient No.	Perfusion delay	T2' [ms]			CBV [ml/100 g]			R2' [s-1]
		Affected hemisphere	Unaffected hemisphere	Ratio	Affected hemisphere	Unaffected hemisphere	Ratio	Affected hemisphere	Unaffected hemisphere	Ratio
OEF_Pat.1	MTT>0sec	119	125	0.95	4.66	4.71	0.99	8.40336	8	1.05042
OEF_Pat.2	MTT>0sec	114	113	1.01	4.57	4.53	1.01	8.77193	8.84956	0.991228
OEF_Pat.4	MTT>0sec	118	122	0.97	6.95	7.34	0.95	8.47458	8.19672	1.0339
OEF_Pat.9	MTT>0sec	105	109	0.96	7.01	7.03	1	9.52381	9.17431	1.0381
OEF_Pat.12	MTT>0sec	134	134	1	14.28	17.14	0.83	7.46269	7.46269	1
OEF_Pat.13	MTT>0sec	117	130	0.9	6.32	6.39	0.99	8.54701	7.69231	1.11111
OEF_Pat.15	MTT>0sec	120	137	0.88	10.62	10.39	1.02	8.33333	7.29927	1.14167
OEF_Pat.17	MTT>0sec	97	143	0.68	7.76	8.31	0.93	10.3093	6.99301	1.47423
OEF_Pat.18	MTT>0sec	117	135	0.87	7.23	7.05	1.03	8.54701	7.40741	1.15385
OEF_Pat.20	MTT>0sec	115	132	0.87	4.74	5.09	0.93	8.69565	7.57576	1.14783
OEF_Pat.21	MTT>0sec	105	117	0.9	8.65	8.56	1.01	9.52381	8.54701	1.11429
OEF_Pat.22	MTT>0sec	107	135	0.79	4.44	4.31	1.03	9.34579	7.40741	1.26168
OEF_Pat.24	MTT>0sec	126	134	0.94	7.25	7.03	1.03	7.93651	7.46269	1.06349
OEF_Pat.25	MTT>0sec	115	123	0.93	11.83	11.95	0.99	8.69565	8.13008	1.06957
OEF_Pat.1	MTT0-2sec	119	125	0.95	4.66	4.71	0.989	8.40336	8	1.05042
OEF_Pat.2	MTT0-2sec	112	116	0.96	5.1	5.06	1.007	8.92857	8.62069	1.03571
OEF_Pat.4	MTT0-2sec	121	121	1	7.81	7.97	0.979	8.26446	8.26446	1
OEF_Pat.9	MTT0-2sec	105	109	0.963	7.01	7.03	0.997	9.52381	9.17431	1.0381
OEF_Pat.12	MTT0-2sec	116	126	0.92	12.76	11.68	1.092	8.62069	7.93651	1.08621
OEF_Pat.13	MTT0-2sec	118	118	1	7.41	6.36	1.165	8.47458	8.47458	1
OEF_Pat.15	MTT0-2sec	119	122	0.975	16.06	17.63	0.91	8.40336	8.19672	1.02521
OEF_Pat.17	MTT0-2sec	127	111	1.144	9.59	7.29	1.315	7.87402	9.00901	0.874016
OEF_Pat.18	MTT0-2sec	118	138	0.855	6.13	6.2	0.988	8.47458	7.24638	1.16949
OEF_Pat.20	MTT0-2sec	115	132	0.871	4.74	5.09	0.931	8.69565	7.57576	1.14783
OEF_Pat.21	MTT0-2sec	110	114	0.964	8.49	10.84	0.783	9.09091	8.77193	1.03636
OEF_Pat.22	MTT0-2sec	107	135	0.792	4.44	4.31	1.03	9.34579	7.40741	1.26168
OEF_Pat.24	MTT0-2sec	124	131	0.946	7.4	7.28	1.016	8.06452	7.63359	1.05645
OEF_Pat.25	MTT0-2sec	118	123	0.959	10.91	11.3	0.965	8.47458	8.13008	1.04237
OEF_Pat.2	MTT>2sec	113	113	1	4.29	4.14	1.036	8.84956	8.84956	1
OEF_Pat.4	MTT>2sec	110	122	0.901	4.6	5.72	0.804	9.09091	8.19672	1.10909
OEF_Pat.12	MTT>2sec	135	136	0.992	15.36	15.47	0.992	7.40741	7.35294	1.00741
OEF_Pat.13	MTT>2sec	116	133	0.872	6.34	6.32	1.003	8.62069	7.5188	1.14655
OEF_Pat.15	MTT>2sec	121	139	0.87	10.41	10.15	1.025	8.26446	7.19424	1.14876
OEF_Pat.17	MTT>2sec	92	150	0.613	7.31	8.05	0.908	10.8696	6.66667	1.63043
OEF_Pat.18	MTT>2sec	121	127	0.952	12.17	8.22	1.48	8.26446	7.87402	1.04959
OEF_Pat.21	MTT>2sec	104	117	0.888	8.78	9.59	0.915	9.61538	8.54701	1.125
OEF_Pat.24	MTT>2sec	123	136	0.904	7.78	7.34	1.059	8.13008	7.35294	1.10569
OEF_Pat.25	MTT>2sec	111	119	0.932	12.98	12	1.081	9.00901	8.40336	1.07207
OEF_Pat.2	MTT2-4sec	114	116	0.98	4.82	4.45	1.08	8.77193	8.62069	1.01754
OEF_Pat.4	MTT2-4sec	106	124	0.85	4.19	4.34	0.97	9.43396	8.06452	1.16981
OEF_Pat.12	MTT2-4sec	133	133	1	19.22	15.96	1.2	7.5188	7.5188	1
OEF_Pat.13	MTT2-4sec	125	126	0.99	7.54	7.42	1.02	8	7.93651	1.008
OEF_Pat.15	MTT2-4sec	117	156	0.75	12.96	12.67	1.02	8.54701	6.41026	1.33333
OEF_Pat.17	MTT2-4sec	107	139	0.77	7.83	8.7	0.9	9.34579	7.19424	1.29907
OEF_Pat.18	MTT2-4sec	128	139	0.92	6.65	5.88	1.13	7.8125	7.19424	1.08594
OEF_Pat.21	MTT2-4sec	104	110	0.95	10.76	10.36	1.04	9.61538	9.09091	1.05769
OEF_Pat.24	MTT2-4sec	123	132	0.93	6.54	6.15	1.06	8.13008	7.57576	1.07317
OEF_Pat.25	MTT2-4sec	106	113	0.94	13.09	12.78	1.02	9.43396	8.84956	1.06604
OEF_Pat.2	MTT>4sec	112	103	1.087	3.84	4.12	0.932	8.92857	9.70874	0.919643
OEF_Pat.4	MTT>4sec	89	124	0.717	5.55	3.93	1.412	11.236	8.06452	1.39326
OEF_Pat.12	MTT>4sec	135	137	0.985	12.39	14.52	0.853	7.40741	7.29927	1.01481
OEF_Pat.13	MTT>4sec	113	134	0.843	6.02	6.34	0.949	8.84956	7.46269	1.18584
OEF_Pat.15	MTT>4sec	118	137	0.861	9.78	9.94	0.983	8.47458	7.29927	1.16102
OEF_Pat.17	MTT>4sec	88	156	0.564	7.06	7.75	0.91	11.3636	6.41026	1.77273
OEF_Pat.18	MTT>4sec	88	130	0.676	23.11	15.87	1.45	11.3636	7.69231	1.47727
OEF_Pat.21	MTT>4sec	109	123	0.886	7.6	8.48	0.896	9.17431	8.13008	1.12844
OEF_Pat.24	MTT>4sec	120	141	0.851	7.99	8.1	0.986	8.33333	7.0922	1.175
OEF_Pat.25	MTT>4sec	117	126	0.928	13.84	12.28	1.127	8.54701	7.93651	1.07692
OEF_Pat.2	MTT4-6sec	112	103	1.087	3.84	4.12	0.932	8.92857	9.70874	0.919643
OEF_Pat.4	MTT4-6sec	89	124	0.717	5.55	3.93	1.412	11.236	8.06452	1.39326
OEF_Pat.12	MTT4-6sec	136	136	1	19.22	15.96	1.2	7.35294	7.35294	1
OEF_Pat.13	MTT4-6sec	120	134	0.9	6.28	5.62	1.12	8.33333	7.46269	1.11667
OEF_Pat.15	MTT4-6sec	121	162	0.75	11.64	10.77	1.08	8.26446	6.17284	1.33884
OEF_Pat.17	MTT4-6sec	104	150	0.69	7.03	8.05	0.87	9.61538	6.66667	1.44231
OEF_Pat.18	MTT4-6sec	88	130	0.676	23.11	15.87	1.45	11.3636	7.69231	1.47727
OEF_Pat.21	MTT4-6sec	113	119	0.95	7.93	8.94	0.89	8.84956	8.40336	1.0531
OEF_Pat.24	MTT4-6sec	120	141	0.851	7.99	8.1	0.986	8.33333	7.0922	1.175
OEF_Pat.25	MTT4-6sec	110	126	0.87	15.68	14.43	1.09	9.09091	7.93651	1.14545
OEF_Pat.12	MTT>6sec	134	136	0.985	11.07	13.12	0.843	7.46269	7.35294	1.01493
OEF_Pat.13	MTT>6sec	111	135	0.822	5.81	6.17	0.941	9.00901	7.40741	1.21622
OEF_Pat.17	MTT>6sec	80	159	0.503	6.83	7.37	0.926	12.5	6.28931	1.9875
OEF_Pat.15	MTT>6sec	119	136	0.875	9.44	9.91	0.952	8.40336	7.35294	1.14286
OEF_Pat.21	MTT>6sec	109	128	0.851	7.09	8.04	0.881	9.17431	7.8125	1.17431
OEF_Pat.25	MTT>6sec	134	128	1.046	7.26	7.04	1.031	7.46269	7.8125	0.955224
OEF_Pat.12	MTT6-8sec	130	135	0.96	12.35	13.51	0.91	7.69	7.41	1.03779
OEF_Pat.13	MTT6-8sec	142	176	0.81	6.63	6.35	1.04	7.04	5.68	1.23944
OEF_Pat.17	MTT6-8sec	126	138	0.91	11.77	12.56	0.94	7.94	7.25	1.09517
OEF_Pat.15	MTT6-8sec	113	158	0.72	7.68	7.7	1	8.85	6.33	1.3981
OEF_Pat.21	MTT6-8sec	112	127	0.88	7.07	8.47	0.83	8.93	7.87	1.13469
OEF_Pat.12	MTT>8sec	132	137	0.963	10.44	14.19	0.735	7.57576	7.29927	1.03788
OEF_Pat.13	MTT>8sec	111	134	0.828	5.9	6.01	0.981	9.00901	7.46269	1.20721
OEF_Pat.15	MTT>8sec	121	138	0.876	9.21	9.39	0.98	8.26446	7.24638	1.1405
OEF_Pat.17	MTT>8sec	80	157	0.509	6.66	7.52	0.885	12.5	6.36943	1.9625
OEF_Pat.21	MTT>8sec	113	123	0.918	7.32	8.68	0.843	8.84956	8.13008	1.0885
OEF_Pat.12	MTT>10sec	131	137	0.956	10.13	13.98	0.724	7.63359	7.29927	1.0458
OEF_Pat.13	MTT>10sec	111	130	0.853	6.39	6.31	1.012	9.00901	7.69231	1.17117
OEF_Pat.15	MTT>10sec	123	139	0.884	8.54	8.8	0.97	8.13008	7.19424	1.13008
OEF_Pat.17	MTT>10sec	79	167	0.473	5.65	6.43	0.878	12.6582	5.98802	2.11392
OEF_Pat.21	MTT>10sec	116	117	0.991	7.88	8.64	0.912	8.62069	8.54701	1.00862
OEF_Pat.12	MTT>12sec	129	139	0.928	9.99	14.24	0.701	7.75194	7.19424	1.07752
OEF_Pat.13	MTT>12sec	115	153	0.751	4.86	6.35	0.765	8.69565	6.53595	1.33043
OEF_Pat.15	MTT>12sec	127	131	0.969	8.34	8.53	0.977	7.87402	7.63359	1.0315
OEF_Pat.17	MTT>12sec	89	191	0.465	5.57	5.42	1.027	11.236	5.2356	2.14607
OEF_Pat.21	MTT>12sec	112	118	0.949	9.84	10.9	0.902	8.92857	8.47458	1.05357
OEF_Pat.12	MTT>14sec	129	138	0.93	9.61	13.19	0.73	7.75194	7.24638	1.06977
OEF_Pat.13	MTT>14sec	119	158	0.75	5.4	5.8	0.93	8.40336	6.32911	1.32773
OEF_Pat.15	MTT>14sec	134	124	1.08	8.03	9.49	0.85	7.46269	8.06452	0.925373
OEF_Pat.12	MTT>16sec	128	141	0.907	9.56	12.96	0.737	7.8125	7.0922	1.10156
OEF_Pat.12	MTT>18sec	123	138	0.891	8.46	12.3	0.687	8.13008	7.24638	1.12195
OEF_Pat.12	MTT>20sec	124	139	0.892	8.25	11.84	0.696	8.06452	7.19424	1.12097
	Commas were used to separate the decimals
